# Supplementary material
Source: publisher figshare collection journal article supplement (https://rs.figshare.com/ndownloader/files/43780503)
Supplement: Supplementary file 1 [file 43780503]

	date	temp
1	1/06/2002	13.784
2	2/06/2002	14.016
3	3/06/2002	14.013
4	4/06/2002	14.079
5	5/06/2002	13.999
6	6/06/2002	14.011
7	7/06/2002	13.885
8	8/06/2002	13.873
9	9/06/2002	13.723
10	10/06/2002	13.544
11	11/06/2002	13.726
12	12/06/2002	13.735
13	13/06/2002	13.645
14	14/06/2002	13.541
15	15/06/2002	13.512
16	16/06/2002	13.59
17	17/06/2002	13.596
18	18/06/2002	13.53
19	19/06/2002	13.667
20	20/06/2002	13.836
21	21/06/2002	13.561
22	22/06/2002	13.261
23	23/06/2002	13.223
24	24/06/2002	13.275
25	25/06/2002	13.228
26	26/06/2002	13.212
27	27/06/2002	13.106
28	28/06/2002	12.975
29	29/06/2002	13.138
30	30/06/2002	13.118
31	1/07/2002	13.1
32	2/07/2002	13.053
33	3/07/2002	13.041
34	4/07/2002	12.717
35	5/07/2002	12.535
36	6/07/2002	12.62
37	7/07/2002	12.725
38	8/07/2002	12.199
39	9/07/2002	12.181
40	10/07/2002	12.236
41	11/07/2002	12.368
42	12/07/2002	12.303
43	13/07/2002	12.201
44	14/07/2002	12.148
45	15/07/2002	12.281
46	16/07/2002	12.081
47	17/07/2002	11.928
48	18/07/2002	11.848
49	19/07/2002	11.819
50	20/07/2002	12.568
51	21/07/2002	12.591
52	22/07/2002	12.555
53	23/07/2002	12.706
54	24/07/2002	12.764
55	25/07/2002	12.601
56	26/07/2002	12.619
57	27/07/2002	12.594
58	28/07/2002	12.476
59	29/07/2002	12.549
60	30/07/2002	12.519
61	31/07/2002	12.543
62	1/08/2002	11.735
63	2/08/2002	10.852
64	3/08/2002	13.199
65	4/08/2002	13.257
66	5/08/2002	13.244
67	6/08/2002	12.614
68	7/08/2002	12.56
69	8/08/2002	12.468
70	9/08/2002	12.358
71	10/08/2002	12.35
72	11/08/2002	12.447
73	12/08/2002	12.572
74	13/08/2002	12.557
75	14/08/2002	12.558
76	15/08/2002	12.584
77	16/08/2002	12.491
78	17/08/2002	12.356
79	18/08/2002	12.4
80	19/08/2002	12.262
81	20/08/2002	12.213
82	21/08/2002	12.218
83	22/08/2002	12.376
84	23/08/2002	12.29
85	24/08/2002	12.195
86	25/08/2002	12.194
87	26/08/2002	12.223
88	27/08/2002	12.198
89	28/08/2002	12.061
90	29/08/2002	11.968
91	30/08/2002	12.238
92	31/08/2002	12.135
93	1/09/2002	12.156
94	2/09/2002	12.139
95	3/09/2002	12.317
96	4/09/2002	12.076
97	5/09/2002	12.228
98	6/09/2002	12.385
99	7/09/2002	12.47
100	8/09/2002	12.468
101	9/09/2002	12.211
102	10/09/2002	12.273
103	11/09/2002	12.227
104	12/09/2002	12.134
105	13/09/2002	12.003
106	14/09/2002	12.012
107	15/09/2002	11.83
108	16/09/2002	11.767
109	17/09/2002	11.837
110	18/09/2002	11.881
111	19/09/2002	11.667
112	20/09/2002	11.68
113	21/09/2002	12.037
114	22/09/2002	12.184
115	23/09/2002	12.117
116	24/09/2002	11.999
117	25/09/2002	11.96
118	26/09/2002	12.004
119	27/09/2002	12.05
120	28/09/2002	11.913
121	29/09/2002	11.846
122	30/09/2002	11.814
123	1/10/2002	12.009
124	2/10/2002	12.055
125	3/10/2002	12.005
126	4/10/2002	11.988
127	5/10/2002	12.142
128	6/10/2002	12.654
129	7/10/2002	12.383
130	8/10/2002	12.034
131	9/10/2002	12.226
132	10/10/2002	12.563
133	11/10/2002	12.773
134	12/10/2002	12.706
135	13/10/2002	12.229
136	14/10/2002	12.3
137	15/10/2002	12.61
138	16/10/2002	12.794
139	17/10/2002	12.761
140	18/10/2002	12.88
141	19/10/2002	12.657
142	20/10/2002	12.598
143	21/10/2002	12.601
144	22/10/2002	12.584
145	23/10/2002	12.537
146	24/10/2002	12.638
147	25/10/2002	12.546
148	26/10/2002	12.432
149	27/10/2002	12.563
150	28/10/2002	12.578
151	29/10/2002	12.606
152	30/10/2002	12.778
153	31/10/2002	12.346
154	1/11/2002	12.236
155	2/11/2002	12.359
156	3/11/2002	12.62
157	4/11/2002	12.56
158	5/11/2002	12.773
159	6/11/2002	13.031
160	7/11/2002	13.044
161	8/11/2002	12.729
162	9/11/2002	12.537
163	10/11/2002	12.682
164	11/11/2002	12.78
165	12/11/2002	12.785
166	13/11/2002	12.937
167	14/11/2002	12.568
168	15/11/2002	12.599
169	16/11/2002	13.03
170	17/11/2002	13.123
171	18/11/2002	13.062
172	19/11/2002	13.129
173	20/11/2002	13.069
174	21/11/2002	13.109
175	22/11/2002	13.274
176	23/11/2002	13.333
177	24/11/2002	13.272
178	25/11/2002	13.49
179	26/11/2002	13.64
180	27/11/2002	13.808
181	28/11/2002	13.931
182	29/11/2002	14.544
183	30/11/2002	14.341
184	1/12/2002	14.354
185	2/12/2002	14.452
186	3/12/2002	14.615
187	4/12/2002	14.447
188	5/12/2002	13.825
189	6/12/2002	13.813
190	7/12/2002	13.406
191	8/12/2002	13.311
192	9/12/2002	13.355
193	10/12/2002	13.557
194	11/12/2002	13.467
195	12/12/2002	13.493
196	13/12/2002	13.686
197	14/12/2002	13.833
198	15/12/2002	13.969
199	16/12/2002	13.95
200	17/12/2002	14.01
201	18/12/2002	15.803
202	19/12/2002	16.045
203	20/12/2002	16.294
204	21/12/2002	15.98
205	22/12/2002	14.5
206	23/12/2002	14.368
207	24/12/2002	14.126
208	25/12/2002	13.893
209	26/12/2002	13.91
210	27/12/2002	14.043
211	28/12/2002	14.286
212	29/12/2002	15.589
213	30/12/2002	15.138
214	31/12/2002	15.418
215	1/01/2003	16.19
216	2/01/2003	16.112
217	3/01/2003	15.918
218	4/01/2003	15.371
219	5/01/2003	15.66
220	6/01/2003	16.037
221	7/01/2003	16.468
222	8/01/2003	16.483
223	9/01/2003	16.997
224	10/01/2003	17.297
225	11/01/2003	17.323
226	12/01/2003	17.449
227	13/01/2003	17.47
228	14/01/2003	15.846
229	15/01/2003	16.71
230	16/01/2003	16.859
231	17/01/2003	16.824
232	18/01/2003	16.862
233	19/01/2003	16.775
234	20/01/2003	16.737
235	21/01/2003	15.984
236	22/01/2003	16.332
237	23/01/2003	16.723
238	24/01/2003	16.993
239	25/01/2003	17.018
240	26/01/2003	16.703
241	27/01/2003	16.598
242	28/01/2003	17.172
243	29/01/2003	17.133
244	30/01/2003	16.891
245	31/01/2003	16.669
246	1/02/2003	16.791
247	2/02/2003	17.164
248	3/02/2003	17.319
249	4/02/2003	17.245
250	5/02/2003	17.41
251	6/02/2003	17.422
252	7/02/2003	17.354
253	8/02/2003	17.317
254	9/02/2003	17.364
255	10/02/2003	17.314
256	11/02/2003	17.462
257	12/02/2003	17.512
258	13/02/2003	17.11
259	14/02/2003	17.371
260	15/02/2003	17.378
261	16/02/2003	17.107
262	17/02/2003	16.701
263	18/02/2003	16.466
264	19/02/2003	16.454
265	20/02/2003	16.517
266	21/02/2003	16.967
267	22/02/2003	17.283
268	23/02/2003	17.303
269	24/02/2003	17.225
270	25/02/2003	17.265
271	26/02/2003	17.196
272	27/02/2003	17.183
273	28/02/2003	17.165
274	1/03/2003	16.952
275	2/03/2003	16.747
276	3/03/2003	16.56
277	4/03/2003	16.541
278	5/03/2003	16.523
279	6/03/2003	16.626
280	7/03/2003	16.652
281	8/03/2003	17.11
282	9/03/2003	17.381
283	10/03/2003	17.419
284	11/03/2003	17.267
285	12/03/2003	17.036
286	13/03/2003	17.033
287	14/03/2003	16.859
288	15/03/2003	17.039
289	16/03/2003	17.252
290	17/03/2003	18.114
291	18/03/2003	18.061
292	19/03/2003	18.278
293	20/03/2003	18.323
294	21/03/2003	18.504
295	22/03/2003	17.873
296	23/03/2003	17.532
297	24/03/2003	17.101
298	25/03/2003	17.015
299	26/03/2003	17.102
300	27/03/2003	16.975
301	28/03/2003	16.885
302	29/03/2003	16.753
303	30/03/2003	16.993
304	31/03/2003	17.516
305	1/04/2003	17.492
306	2/04/2003	17.538
307	3/04/2003	17.175
308	4/04/2003	16.461
309	5/04/2003	16.351
310	6/04/2003	16.411
311	7/04/2003	16.432
312	8/04/2003	16.289
313	9/04/2003	15.975
314	10/04/2003	15.759
315	11/04/2003	15.732
316	12/04/2003	15.834
317	13/04/2003	15.611
318	14/04/2003	15.443
319	15/04/2003	15.479
320	16/04/2003	15.473
321	17/04/2003	15.305
322	18/04/2003	15.268
323	19/04/2003	15.363
324	20/04/2003	15.516
325	21/04/2003	15.207
326	22/04/2003	15.253
327	23/04/2003	15.315
328	24/04/2003	15.441
329	25/04/2003	15.064
330	26/04/2003	15.008
331	27/04/2003	15.089
332	28/04/2003	14.859
333	29/04/2003	14.631
334	30/04/2003	14.565
335	1/05/2003	14.622
336	2/05/2003	14.692
337	3/05/2003	14.072
338	4/05/2003	13.817
339	5/05/2003	13.87
340	6/05/2003	13.884
341	7/05/2003	14.193
342	8/05/2003	14.49
343	9/05/2003	14.216
344	10/05/2003	14.101
345	11/05/2003	14.017
346	12/05/2003	13.957
347	13/05/2003	13.905
348	14/05/2003	14.065
349	15/05/2003	13.926
350	16/05/2003	13.971
351	17/05/2003	14.004
352	18/05/2003	14.018
353	19/05/2003	14.05
354	20/05/2003	14.142
355	21/05/2003	13.916
356	22/05/2003	13.791
357	23/05/2003	13.639
358	24/05/2003	13.655
359	25/05/2003	13.664
360	26/05/2003	13.768
361	27/05/2003	13.88
362	28/05/2003	13.933
363	29/05/2003	13.914
364	30/05/2003	13.455
365	31/05/2003	13.459
366	1/06/2003	13.27
367	2/06/2003	13.307
368	3/06/2003	13.374
369	4/06/2003	13.48
370	5/06/2003	13.578
371	6/06/2003	13.518
372	7/06/2003	13.391
373	8/06/2003	13.385
374	9/06/2003	13.436
375	10/06/2003	13.488
376	11/06/2003	13.237
377	12/06/2003	13.522
378	13/06/2003	13.489
379	14/06/2003	13.337
380	15/06/2003	13.382
381	16/06/2003	13.522
382	17/06/2003	13.456
383	18/06/2003	13.392
384	19/06/2003	13.169
385	20/06/2003	13.158
386	21/06/2003	13.007
387	22/06/2003	13.056
388	23/06/2003	12.978
389	24/06/2003	12.8
390	25/06/2003	12.745
391	26/06/2003	12.656
392	27/06/2003	12.783
393	28/06/2003	12.923
394	29/06/2003	13.09
395	30/06/2003	12.845
396	1/07/2003	12.897
397	2/07/2003	13.086
398	3/07/2003	12.947
399	4/07/2003	12.853
400	5/07/2003	12.788
401	6/07/2003	12.692
402	7/07/2003	12.467
403	8/07/2003	12.559
404	9/07/2003	12.701
405	10/07/2003	12.677
406	11/07/2003	12.776
407	12/07/2003	12.777
408	13/07/2003	12.374
409	14/07/2003	12.519
410	15/07/2003	12.336
411	16/07/2003	12.308
412	17/07/2003	12.307
413	18/07/2003	12.408
414	19/07/2003	12.224
415	20/07/2003	12.185
416	21/07/2003	12.287
417	22/07/2003	12.389
418	23/07/2003	12.332
419	24/07/2003	12.488
420	25/07/2003	12.412
421	26/07/2003	12.355
422	27/07/2003	12.409
423	28/07/2003	12.376
424	29/07/2003	12.201
425	30/07/2003	12.381
426	31/07/2003	12.201
427	1/08/2003	12.262
428	2/08/2003	12.381
429	3/08/2003	12.447
430	4/08/2003	12.348
431	5/08/2003	12.193
432	6/08/2003	12.259
433	7/08/2003	12.237
434	8/08/2003	12.216
435	9/08/2003	12.332
436	10/08/2003	12.133
437	11/08/2003	12.059
438	12/08/2003	12.166
439	13/08/2003	12.203
440	14/08/2003	12.033
441	15/08/2003	12.006
442	16/08/2003	12.147
443	17/08/2003	12.079
444	18/08/2003	11.874
445	19/08/2003	11.859
446	20/08/2003	11.828
447	21/08/2003	11.964
448	22/08/2003	11.894
449	23/08/2003	12.026
450	24/08/2003	12.025
451	25/08/2003	11.82
452	26/08/2003	11.694
453	27/08/2003	11.711
454	28/08/2003	11.852
455	29/08/2003	11.765
456	30/08/2003	11.707
457	31/08/2003	11.808
458	1/09/2003	12.114
459	2/09/2003	12.33
460	3/09/2003	11.995
461	4/09/2003	11.916
462	5/09/2003	11.913
463	6/09/2003	11.963
464	7/09/2003	12.303
465	8/09/2003	12.019
466	9/09/2003	11.781
467	10/09/2003	11.822
468	11/09/2003	11.747
469	12/09/2003	11.814
470	13/09/2003	11.499
471	14/09/2003	11.484
472	15/09/2003	11.558
473	16/09/2003	11.65
474	17/09/2003	11.664
475	18/09/2003	11.636
476	19/09/2003	12.031
477	20/09/2003	11.866
478	21/09/2003	11.872
479	22/09/2003	11.942
480	23/09/2003	11.998
481	24/09/2003	11.994
482	25/09/2003	11.975
483	26/09/2003	11.199
484	27/09/2003	11.405
485	28/09/2003	11.406
486	29/09/2003	11.694
487	30/09/2003	11.694
488	1/10/2003	11.654
489	2/10/2003	11.734
490	3/10/2003	11.469
491	4/10/2003	11.49
492	5/10/2003	11.514
493	6/10/2003	11.604
494	7/10/2003	11.556
495	8/10/2003	11.438
496	9/10/2003	11.656
497	10/10/2003	11.741
498	11/10/2003	11.868
499	12/10/2003	11.88
500	13/10/2003	11.85
501	14/10/2003	11.873
502	15/10/2003	11.898
503	16/10/2003	11.961
504	17/10/2003	11.846
505	18/10/2003	11.735
506	19/10/2003	11.917
507	20/10/2003	11.884
508	21/10/2003	11.908
509	22/10/2003	12.004
510	23/10/2003	12.209
511	24/10/2003	12.262
512	25/10/2003	12.083
513	26/10/2003	11.992
514	27/10/2003	11.922
515	28/10/2003	11.825
516	29/10/2003	11.719
517	30/10/2003	11.912
518	31/10/2003	11.779
519	1/11/2003	12.065
520	2/11/2003	12.137
521	3/11/2003	12.224
522	4/11/2003	12.371
523	5/11/2003	12.21
524	6/11/2003	12.216
525	7/11/2003	12.304
526	8/11/2003	12.239
527	9/11/2003	12.191
528	10/11/2003	12.617
529	11/11/2003	12.967
530	12/11/2003	12.42
531	13/11/2003	12.269
532	14/11/2003	12.502
533	15/11/2003	12.649
534	16/11/2003	12.853
535	17/11/2003	12.89
536	18/11/2003	12.911
537	19/11/2003	13.064
538	20/11/2003	12.671
539	21/11/2003	12.584
540	22/11/2003	12.634
541	23/11/2003	12.809
542	24/11/2003	12.823
543	25/11/2003	12.87
544	26/11/2003	13.408
545	27/11/2003	13.861
546	28/11/2003	14.051
547	29/11/2003	13.792
548	30/11/2003	13.423
549	1/12/2003	13.876
550	2/12/2003	13.961
551	3/12/2003	13.891
552	4/12/2003	14.025
553	5/12/2003	13.375
554	6/12/2003	13.504
555	7/12/2003	13.842
556	8/12/2003	14.169
557	9/12/2003	14.05
558	10/12/2003	13.78
559	11/12/2003	13.656
560	12/12/2003	13.621
561	13/12/2003	13.547
562	14/12/2003	13.524
563	15/12/2003	13.839
564	16/12/2003	14.158
565	17/12/2003	14.051
566	18/12/2003	14.664
567	19/12/2003	14.622
568	20/12/2003	14.707
569	21/12/2003	14.799
570	22/12/2003	14.352
571	23/12/2003	14.439
572	24/12/2003	14.625
573	25/12/2003	14.117
574	26/12/2003	13.921
575	27/12/2003	14.017
576	28/12/2003	14.143
577	29/12/2003	14.246
578	30/12/2003	14.294
579	31/12/2003	14.658
580	1/01/2004	14.974
581	2/01/2004	15.101
582	3/01/2004	14.942
583	4/01/2004	15.054
584	5/01/2004	14.994
585	6/01/2004	14.932
586	7/01/2004	14.751
587	8/01/2004	14.734
588	9/01/2004	14.809
589	10/01/2004	14.837
590	11/01/2004	14.861
591	12/01/2004	14.862
592	13/01/2004	14.832
593	14/01/2004	14.721
594	15/01/2004	14.912
595	16/01/2004	14.917
596	17/01/2004	15.275
597	18/01/2004	15.417
598	19/01/2004	15.356
599	20/01/2004	15.279
600	21/01/2004	15.036
601	22/01/2004	14.935
602	23/01/2004	15.158
603	24/01/2004	15.34
604	25/01/2004	15.381
605	26/01/2004	15.501
606	27/01/2004	15.956
607	28/01/2004	16.183
608	29/01/2004	15.398
609	30/01/2004	15.634
610	31/01/2004	15.299
611	1/02/2004	16.197
612	2/02/2004	16.281
613	3/02/2004	16.087
614	4/02/2004	16.02
615	5/02/2004	16.051
616	6/02/2004	16.098
617	7/02/2004	16.18
618	8/02/2004	15.972
619	9/02/2004	15.894
620	10/02/2004	15.961
621	11/02/2004	16.097
622	12/02/2004	16.559
623	13/02/2004	16.61
624	14/02/2004	16.543
625	15/02/2004	16.026
626	16/02/2004	15.873
627	17/02/2004	16.111
628	18/02/2004	16.39
629	19/02/2004	16.247
630	20/02/2004	16.126
631	21/02/2004	16.165
632	22/02/2004	15.925
633	23/02/2004	15.976
634	24/02/2004	16.076
635	25/02/2004	16.842
636	26/02/2004	16.856
637	27/02/2004	16.692
638	28/02/2004	16.587
639	29/02/2004	15.94
640	1/03/2004	15.864
641	2/03/2004	15.846
642	3/03/2004	15.867
643	4/03/2004	15.599
644	5/03/2004	15.572
645	6/03/2004	15.7
646	7/03/2004	15.692
647	8/03/2004	15.605
648	9/03/2004	15.497
649	10/03/2004	15.604
650	11/03/2004	15.546
651	12/03/2004	15.46
652	13/03/2004	15.544
653	14/03/2004	15.59
654	15/03/2004	15.638
655	16/03/2004	15.707
656	17/03/2004	15.564
657	18/03/2004	15.139
658	19/03/2004	15.187
659	20/03/2004	15.301
660	21/03/2004	15.388
661	22/03/2004	15.393
662	23/03/2004	15.146
663	24/03/2004	14.659
664	25/03/2004	15.145
665	26/03/2004	15.468
666	27/03/2004	15.287
667	28/03/2004	15.378
668	29/03/2004	15.261
669	30/03/2004	14.828
670	31/03/2004	14.539
671	1/04/2004	14.524
672	2/04/2004	14.546
673	3/04/2004	14.546
674	4/04/2004	14.173
675	5/04/2004	14.146
676	6/04/2004	14.32
677	7/04/2004	14.391
678	8/04/2004	14.364
679	9/04/2004	14.372
680	10/04/2004	14.066
681	11/04/2004	13.802
682	12/04/2004	13.763
683	13/04/2004	13.931
684	14/04/2004	13.894
685	15/04/2004	13.795
686	16/04/2004	13.81
687	17/04/2004	13.946
688	18/04/2004	14.065
689	19/04/2004	14.03
690	20/04/2004	14.265
691	21/04/2004	14.353
692	22/04/2004	14.257
693	23/04/2004	14.239
694	24/04/2004	14.149
695	25/04/2004	13.735
696	26/04/2004	13.795
697	27/04/2004	13.942
698	28/04/2004	13.862
699	29/04/2004	13.978
700	30/04/2004	13.938
701	1/05/2004	13.949
702	2/05/2004	13.721
703	3/05/2004	13.951
704	4/05/2004	13.25
705	5/05/2004	13.181
706	6/05/2004	13.193
707	7/05/2004	13.192
708	8/05/2004	13.164
709	9/05/2004	13.053
710	10/05/2004	12.658
711	11/05/2004	12.299
712	12/05/2004	12.476
713	13/05/2004	12.982
714	14/05/2004	12.909
715	15/05/2004	12.868
716	16/05/2004	12.841
717	17/05/2004	12.892
718	18/05/2004	12.461
719	19/05/2004	12.411
720	20/05/2004	12.457
721	21/05/2004	12.473
722	22/05/2004	12.439
723	23/05/2004	12.454
724	24/05/2004	12.391
725	25/05/2004	12.329
726	26/05/2004	12.372
727	27/05/2004	12.222
728	28/05/2004	12.122
729	29/05/2004	12.174
730	30/05/2004	12.364
731	31/05/2004	12.13
732	1/06/2004	11.971
733	2/06/2004	11.997
734	3/06/2004	12.15
735	4/06/2004	12.588
736	5/06/2004	12.726
737	6/06/2004	12.618
738	7/06/2004	12.342
739	8/06/2004	12.372
740	9/06/2004	12.325
741	10/06/2004	12.503
742	11/06/2004	12.453
743	12/06/2004	12.136
744	13/06/2004	12.103
745	14/06/2004	12.24
746	15/06/2004	12.266
747	16/06/2004	12.496
748	17/06/2004	12.573
749	18/06/2004	12.547
750	19/06/2004	12.335
751	20/06/2004	12.283
752	21/06/2004	12.215
753	22/06/2004	12.097
754	23/06/2004	12.131
755	24/06/2004	11.957
756	25/06/2004	12.007
757	26/06/2004	12.015
758	27/06/2004	11.95
759	28/06/2004	11.829
760	29/06/2004	12.042
761	30/06/2004	11.994
762	1/07/2004	12.084
763	2/07/2004	12.065
764	3/07/2004	12.091
765	4/07/2004	12.095
766	5/07/2004	12.026
767	6/07/2004	11.802
768	7/07/2004	12.381
769	8/07/2004	12.473
770	9/07/2004	11.838
771	10/07/2004	11.836
772	11/07/2004	11.919
773	12/07/2004	11.966
774	13/07/2004	11.971
775	14/07/2004	12.289
776	15/07/2004	12.185
777	16/07/2004	12.017
778	17/07/2004	11.992
779	18/07/2004	12.093
780	19/07/2004	12.123
781	20/07/2004	12.241
782	21/07/2004	12.097
783	22/07/2004	12.064
784	23/07/2004	11.961
785	24/07/2004	11.967
786	25/07/2004	11.666
787	26/07/2004	11.729
788	27/07/2004	11.829
789	28/07/2004	11.756
790	29/07/2004	11.655
791	30/07/2004	11.747
792	31/07/2004	11.773
793	1/08/2004	11.792
794	2/08/2004	11.758
795	3/08/2004	11.482
796	4/08/2004	11.388
797	5/08/2004	11.412
798	6/08/2004	11.612
799	7/08/2004	11.78
800	8/08/2004	11.776
801	9/08/2004	11.812
802	10/08/2004	10.895
803	11/08/2004	10.937
804	12/08/2004	11.308
805	13/08/2004	11.508
806	14/08/2004	11.175
807	15/08/2004	11.14
808	16/08/2004	11.236
809	17/08/2004	11.324
810	18/08/2004	11.309
811	19/08/2004	11.239
812	20/08/2004	11.119
813	21/08/2004	11.128
814	22/08/2004	11.051
815	23/08/2004	11.103
816	24/08/2004	11.049
817	25/08/2004	10.766
818	26/08/2004	10.574
819	27/08/2004	10.75
820	28/08/2004	10.898
821	29/08/2004	10.911
822	30/08/2004	10.858
823	31/08/2004	10.852
824	1/09/2004	10.994
825	2/09/2004	11.128
826	3/09/2004	11.262
827	4/09/2004	11.279
828	5/09/2004	11.289
829	6/09/2004	11.406
830	7/09/2004	11.354
831	8/09/2004	11.657
832	9/09/2004	11.94
833	10/09/2004	11.948
834	11/09/2004	11.907
835	12/09/2004	11.744
836	13/09/2004	11.511
837	14/09/2004	11.535
838	15/09/2004	11.585
839	16/09/2004	11.559
840	17/09/2004	11.416
841	18/09/2004	11.52
842	19/09/2004	11.8
843	20/09/2004	11.737
844	21/09/2004	11.891
845	22/09/2004	11.981
846	23/09/2004	11.826
847	24/09/2004	11.87
848	25/09/2004	12.057
849	26/09/2004	12.02
850	27/09/2004	11.995
851	28/09/2004	11.9
852	29/09/2004	12.103
853	30/09/2004	12.175
854	1/10/2004	12.193
855	2/10/2004	12.147
856	3/10/2004	12.03
857	4/10/2004	11.786
858	5/10/2004	11.87
859	6/10/2004	11.941
860	7/10/2004	11.84
861	8/10/2004	11.967
862	9/10/2004	12.012
863	10/10/2004	11.997
864	11/10/2004	12.188
865	12/10/2004	12.075
866	13/10/2004	12.069
867	14/10/2004	12.279
868	15/10/2004	12.357
869	16/10/2004	12.226
870	17/10/2004	12.173
871	18/10/2004	12.288
872	19/10/2004	12.584
873	20/10/2004	12.963
874	21/10/2004	12.864
875	22/10/2004	12.917
876	23/10/2004	12.824
877	24/10/2004	12.419
878	25/10/2004	12.296
879	26/10/2004	12.557
880	27/10/2004	12.374
881	28/10/2004	12.574
882	29/10/2004	12.79
883	30/10/2004	13.107
884	31/10/2004	13.072
885	1/11/2004	13.118
886	2/11/2004	13.51
887	3/11/2004	13.445
888	4/11/2004	12.72
889	5/11/2004	12.418
890	6/11/2004	12.439
891	7/11/2004	13.438
892	8/11/2004	13.361
893	9/11/2004	13.368
894	10/11/2004	13.397
895	11/11/2004	13.47
896	12/11/2004	13.436
897	13/11/2004	13.231
898	14/11/2004	13.211
899	15/11/2004	13.064
900	16/11/2004	12.721
901	17/11/2004	13.092
902	18/11/2004	13.181
903	19/11/2004	13.155
904	20/11/2004	12.99
905	21/11/2004	12.698
906	22/11/2004	12.612
907	23/11/2004	12.628
908	24/11/2004	13.292
909	25/11/2004	13.327
910	26/11/2004	13.47
911	27/11/2004	13.279
912	28/11/2004	13.115
913	29/11/2004	13.131
914	30/11/2004	13.26
915	1/12/2004	12.857
916	2/12/2004	12.965
917	3/12/2004	12.997
918	4/12/2004	13.419
919	5/12/2004	14.254
920	6/12/2004	14.229
921	7/12/2004	14.304
922	8/12/2004	15.49
923	9/12/2004	15.835
924	10/12/2004	16.101
925	11/12/2004	16.158
926	12/12/2004	15.46
927	13/12/2004	15.331
928	14/12/2004	15.014
929	15/12/2004	14.573
930	16/12/2004	14.213
931	17/12/2004	14.152
932	18/12/2004	14.511
933	19/12/2004	14.23
934	20/12/2004	14.25
935	21/12/2004	14.58
936	22/12/2004	15.114
937	23/12/2004	14.98
938	24/12/2004	14.749
939	25/12/2004	14.553
940	26/12/2004	14.512
941	27/12/2004	14.348
942	28/12/2004	14.218
943	29/12/2004	14.231
944	30/12/2004	14.495
945	31/12/2004	14.77
946	1/01/2005	14.37
947	2/01/2005	14.583
948	3/01/2005	14.728
949	4/01/2005	15.188
950	5/01/2005	14.888
951	6/01/2005	15.093
952	7/01/2005	14.573
953	8/01/2005	15.268
954	9/01/2005	15.298
955	10/01/2005	15.362
956	11/01/2005	15.323
957	12/01/2005	14.932
958	13/01/2005	14.728
959	14/01/2005	14.725
960	15/01/2005	14.754
961	16/01/2005	14.961
962	17/01/2005	15.109
963	18/01/2005	15.236
964	19/01/2005	15.106
965	20/01/2005	15.009
966	21/01/2005	14.95
967	22/01/2005	15.361
968	23/01/2005	15.819
969	24/01/2005	16.404
970	25/01/2005	16.387
971	26/01/2005	16.435
972	27/01/2005	16.593
973	28/01/2005	15.951
974	29/01/2005	15.815
975	30/01/2005	15.712
976	31/01/2005	15.484
977	1/02/2005	15.582
978	2/02/2005	15.686
979	3/02/2005	15.634
980	4/02/2005	15.283
981	5/02/2005	15.103
982	6/02/2005	15.076
983	7/02/2005	15.199
984	8/02/2005	15.135
985	9/02/2005	15.175
986	10/02/2005	15.329
987	11/02/2005	15.6
988	12/02/2005	15.59
989	13/02/2005	15.615
990	14/02/2005	15.599
991	15/02/2005	15.525
992	16/02/2005	15.186
993	17/02/2005	15.128
994	18/02/2005	15.289
995	19/02/2005	15.527
996	20/02/2005	15.717
997	21/02/2005	15.901
998	22/02/2005	16.299
999	23/02/2005	16.303
1000	24/02/2005	16.462
1001	25/02/2005	16.206
1002	26/02/2005	15.929
1003	27/02/2005	15.805
1004	28/02/2005	15.789
1005	1/03/2005	15.733
1006	2/03/2005	15.775
1007	3/03/2005	15.867
1008	4/03/2005	15.385
1009	5/03/2005	15.483
1010	6/03/2005	15.509
1011	7/03/2005	15.51
1012	8/03/2005	15.138
1013	9/03/2005	15.232
1014	10/03/2005	15.292
1015	11/03/2005	15.267
1016	12/03/2005	16.05
1017	13/03/2005	16.33
1018	14/03/2005	16.37
1019	15/03/2005	15.705
1020	16/03/2005	15.757
1021	17/03/2005	15.767
1022	18/03/2005	15.525
1023	19/03/2005	15.531
1024	20/03/2005	15.539
1025	21/03/2005	15.532
1026	22/03/2005	15.535
1027	23/03/2005	15.527
1028	24/03/2005	15.541
1029	25/03/2005	15.382
1030	26/03/2005	15.191
1031	27/03/2005	15.047
1032	28/03/2005	14.995
1033	29/03/2005	15.037
1034	30/03/2005	15.228
1035	31/03/2005	15.187
1036	1/04/2005	15.144
1037	2/04/2005	15.007
1038	3/04/2005	14.873
1039	4/04/2005	14.152
1040	5/04/2005	14.68
1041	6/04/2005	14.901
1042	7/04/2005	14.932
1043	8/04/2005	14.92
1044	9/04/2005	14.99
1045	10/04/2005	14.696
1046	11/04/2005	14.399
1047	12/04/2005	14.492
1048	13/04/2005	14.615
1049	14/04/2005	14.618
1050	15/04/2005	14.627
1051	16/04/2005	14.25
1052	17/04/2005	14.182
1053	18/04/2005	14.299
1054	19/04/2005	14.292
1055	20/04/2005	14.318
1056	21/04/2005	14.345
1057	22/04/2005	14.334
1058	23/04/2005	14.274
1059	24/04/2005	14.259
1060	25/04/2005	14.207
1061	26/04/2005	13.976
1062	27/04/2005	13.795
1063	28/04/2005	13.879
1064	29/04/2005	14.076
1065	30/04/2005	14.065
1066	1/05/2005	14.009
1067	2/05/2005	13.967
1068	3/05/2005	13.854
1069	4/05/2005	13.784
1070	5/05/2005	13.822
1071	6/05/2005	13.842
1072	7/05/2005	13.912
1073	8/05/2005	13.906
1074	9/05/2005	13.794
1075	10/05/2005	13.799
1076	11/05/2005	13.913
1077	12/05/2005	13.833
1078	13/05/2005	13.664
1079	14/05/2005	13.693
1080	15/05/2005	13.546
1081	16/05/2005	13.532
1082	17/05/2005	13.373
1083	18/05/2005	13.223
1084	19/05/2005	13.169
1085	20/05/2005	13.039
1086	21/05/2005	13.215
1087	22/05/2005	13.473
1088	23/05/2005	13.418
1089	24/05/2005	13.351
1090	25/05/2005	13.408
1091	26/05/2005	13.552
1092	27/05/2005	13.441
1093	28/05/2005	12.993
1094	29/05/2005	12.845
1095	30/05/2005	12.9
1096	31/05/2005	12.936
1097	1/06/2005	12.874
1098	2/06/2005	12.887
1099	3/06/2005	12.925
1100	4/06/2005	12.998
1101	5/06/2005	12.973
1102	6/06/2005	12.614
1103	7/06/2005	12.579
1104	8/06/2005	12.499
1105	9/06/2005	12.35
1106	10/06/2005	12.537
1107	11/06/2005	12.555
1108	12/06/2005	12.563
1109	13/06/2005	12.535
1110	14/06/2005	12.39
1111	15/06/2005	12.354
1112	16/06/2005	12.553
1113	17/06/2005	12.474
1114	18/06/2005	12.539
1115	19/06/2005	12.589
1116	20/06/2005	12.705
1117	21/06/2005	12.86
1118	22/06/2005	12.73
1119	23/06/2005	12.639
1120	24/06/2005	12.738
1121	25/06/2005	12.686
1122	26/06/2005	12.751
1123	27/06/2005	12.753
1124	28/06/2005	12.703
1125	29/06/2005	12.677
1126	30/06/2005	12.724
1127	1/07/2005	12.768
1128	2/07/2005	12.786
1129	3/07/2005	12.93
1130	4/07/2005	12.74
1131	5/07/2005	12.572
1132	6/07/2005	12.655
1133	7/07/2005	12.605
1134	8/07/2005	12.573
1135	9/07/2005	12.316
1136	10/07/2005	12.55
1137	11/07/2005	12.869
1138	12/07/2005	12.992
1139	13/07/2005	12.954
1140	14/07/2005	12.932
1141	15/07/2005	12.954
1142	16/07/2005	13.014
1143	17/07/2005	12.808
1144	18/07/2005	12.525
1145	19/07/2005	12.771
1146	20/07/2005	12.909
1147	21/07/2005	12.838
1148	22/07/2005	12.809
1149	23/07/2005	12.966
1150	24/07/2005	12.938
1151	25/07/2005	12.652
1152	26/07/2005	12.38
1153	27/07/2005	12.376
1154	28/07/2005	12.416
1155	29/07/2005	12.455
1156	30/07/2005	12.576
1157	31/07/2005	12.587
1158	1/08/2005	12.526
1159	2/08/2005	12.379
1160	3/08/2005	12.298
1161	4/08/2005	12.316
1162	5/08/2005	12.264
1163	6/08/2005	12.186
1164	7/08/2005	12.168
1165	8/08/2005	12.279
1166	9/08/2005	12.463
1167	10/08/2005	12.48
1168	11/08/2005	12.399
1169	12/08/2005	12.503
1170	13/08/2005	12.666
1171	14/08/2005	12.706
1172	15/08/2005	12.828
1173	16/08/2005	12.817
1174	17/08/2005	12.645
1175	18/08/2005	12.318
1176	19/08/2005	12.293
1177	20/08/2005	12.316
1178	21/08/2005	12.285
1179	22/08/2005	12.364
1180	23/08/2005	12.295
1181	24/08/2005	12.28
1182	25/08/2005	12.276
1183	26/08/2005	12.242
1184	27/08/2005	12.208
1185	28/08/2005	12.101
1186	29/08/2005	11.864
1187	30/08/2005	11.932
1188	31/08/2005	11.894
1189	1/09/2005	12.033
1190	2/09/2005	12.068
1191	3/09/2005	12.183
1192	4/09/2005	12.182
1193	5/09/2005	12.244
1194	6/09/2005	12.344
1195	7/09/2005	12.319
1196	8/09/2005	12.182
1197	9/09/2005	12.097
1198	10/09/2005	12.186
1199	11/09/2005	12.423
1200	12/09/2005	11.971
1201	13/09/2005	11.835
1202	14/09/2005	12.076
1203	15/09/2005	12.294
1204	16/09/2005	12.298
1205	17/09/2005	12.403
1206	18/09/2005	12.498
1207	19/09/2005	12.528
1208	20/09/2005	12.547
1209	21/09/2005	12.498
1210	22/09/2005	12.392
1211	23/09/2005	12.793
1212	24/09/2005	12.528
1213	25/09/2005	12.301
1214	26/09/2005	12.415
1215	27/09/2005	12.699
1216	28/09/2005	12.791
1217	29/09/2005	12.19
1218	30/09/2005	12.407
1219	1/10/2005	12.466
1220	2/10/2005	12.499
1221	3/10/2005	12.48
1222	4/10/2005	12.484
1223	5/10/2005	12.391
1224	6/10/2005	12.416
1225	7/10/2005	12.302
1226	8/10/2005	12.091
1227	9/10/2005	12.255
1228	10/10/2005	12.332
1229	11/10/2005	12.393
1230	12/10/2005	12.409
1231	13/10/2005	12.406
1232	14/10/2005	12.401
1233	15/10/2005	12.506
1234	16/10/2005	12.563
1235	17/10/2005	13.114
1236	18/10/2005	13.438
1237	19/10/2005	13.413
1238	20/10/2005	13.513
1239	21/10/2005	13.711
1240	22/10/2005	13.595
1241	23/10/2005	13.698
1242	24/10/2005	13.815
1243	25/10/2005	13.776
1244	26/10/2005	13.755
1245	27/10/2005	13.624
1246	28/10/2005	13.503
1247	29/10/2005	13.502
1248	30/10/2005	13.606
1249	31/10/2005	14.443
1250	1/11/2005	14.378
1251	2/11/2005	14.243
1252	3/11/2005	13.652
1253	4/11/2005	13.734
1254	5/11/2005	13.988
1255	6/11/2005	13.956
1256	7/11/2005	13.806
1257	8/11/2005	14.154
1258	9/11/2005	14.137
1259	10/11/2005	14.181
1260	11/11/2005	14.097
1261	12/11/2005	14.265
1262	13/11/2005	14.291
1263	14/11/2005	14.132
1264	15/11/2005	13.837
1265	16/11/2005	13.783
1266	17/11/2005	13.76
1267	18/11/2005	13.99
1268	19/11/2005	13.768
1269	20/11/2005	14.144
1270	21/11/2005	14.446
1271	22/11/2005	14.672
1272	23/11/2005	14.868
1273	24/11/2005	14.776
1274	25/11/2005	14.673
1275	26/11/2005	14.171
1276	27/11/2005	14.069
1277	28/11/2005	14.282
1278	29/11/2005	15.125
1279	30/11/2005	15.103
1280	1/12/2005	15.008
1281	2/12/2005	14.955
1282	3/12/2005	15.198
1283	4/12/2005	14.528
1284	5/12/2005	14.532
1285	6/12/2005	14.558
1286	7/12/2005	14.665
1287	8/12/2005	14.545
1288	9/12/2005	15.168
1289	10/12/2005	15.163
1290	11/12/2005	15.212
1291	12/12/2005	15.08
1292	13/12/2005	15.123
1293	14/12/2005	15.075
1294	15/12/2005	15.178
1295	16/12/2005	15.352
1296	17/12/2005	15.389
1297	18/12/2005	15.407
1298	19/12/2005	15.387
1299	20/12/2005	15.259
1300	21/12/2005	15.225
1301	22/12/2005	15.468
1302	23/12/2005	15.427
1303	24/12/2005	15.388
1304	25/12/2005	15.002
1305	26/12/2005	14.867
1306	27/12/2005	14.609
1307	28/12/2005	14.696
1308	29/12/2005	15.251
1309	30/12/2005	15.543
1310	31/12/2005	15.598
1311	1/01/2006	15.185
1312	2/01/2006	15.28
1313	3/01/2006	15.367
1314	4/01/2006	15.736
1315	5/01/2006	15.934
1316	6/01/2006	15.941
1317	7/01/2006	15.93
1318	8/01/2006	16.309
1319	9/01/2006	15.887
1320	10/01/2006	15.833
1321	11/01/2006	15.845
1322	12/01/2006	15.804
1323	13/01/2006	15.427
1324	14/01/2006	15.565
1325	15/01/2006	15.604
1326	16/01/2006	15.591
1327	17/01/2006	15.773
1328	18/01/2006	16.049
1329	19/01/2006	16.228
1330	20/01/2006	16.194
1331	21/01/2006	16.249
1332	22/01/2006	16.249
1333	23/01/2006	16.215
1334	24/01/2006	16.232
1335	25/01/2006	16.187
1336	26/01/2006	16.569
1337	27/01/2006	17.106
1338	28/01/2006	17.178
1339	29/01/2006	16.912
1340	30/01/2006	16.68
1341	31/01/2006	16.657
1342	1/02/2006	16.809
1343	2/02/2006	16.652
1344	3/02/2006	16.625
1345	4/02/2006	16.725
1346	5/02/2006	16.12
1347	6/02/2006	16.366
1348	7/02/2006	16.465
1349	8/02/2006	16.366
1350	9/02/2006	16.124
1351	10/02/2006	16.06
1352	11/02/2006	15.994
1353	12/02/2006	15.984
1354	13/02/2006	15.975
1355	14/02/2006	15.891
1356	15/02/2006	16.305
1357	16/02/2006	16.509
1358	17/02/2006	16.905
1359	18/02/2006	17.112
1360	19/02/2006	17.082
1361	20/02/2006	17.074
1362	21/02/2006	16.996
1363	22/02/2006	17.011
1364	23/02/2006	16.962
1365	24/02/2006	16.97
1366	25/02/2006	16.837
1367	26/02/2006	16.561
1368	27/02/2006	16.703
1369	28/02/2006	16.423
1370	1/03/2006	16.649
1371	2/03/2006	16.9
1372	3/03/2006	16.942
1373	4/03/2006	17.038
1374	5/03/2006	16.966
1375	6/03/2006	16.954
1376	7/03/2006	16.66
1377	8/03/2006	16.404
1378	9/03/2006	16.436
1379	10/03/2006	16.367
1380	11/03/2006	16.237
1381	12/03/2006	16.084
1382	13/03/2006	15.827
1383	14/03/2006	15.819
1384	15/03/2006	16.061
1385	16/03/2006	16.119
1386	17/03/2006	16.082
1387	18/03/2006	16.047
1388	19/03/2006	16.023
1389	20/03/2006	16.069
1390	21/03/2006	16.154
1391	22/03/2006	16.367
1392	23/03/2006	16.876
1393	24/03/2006	16.682
1394	25/03/2006	16.211
1395	26/03/2006	16.174
1396	27/03/2006	16.34
1397	28/03/2006	16.468
1398	29/03/2006	16.703
1399	30/03/2006	16.596
1400	31/03/2006	15.786
1401	1/04/2006	15.612
1402	2/04/2006	15.463
1403	3/04/2006	15.56
1404	4/04/2006	15.543
1405	5/04/2006	15.554
1406	6/04/2006	15.461
1407	7/04/2006	15.108
1408	8/04/2006	14.85
1409	9/04/2006	14.491
1410	10/04/2006	14.423
1411	11/04/2006	14.386
1412	12/04/2006	14.317
1413	13/04/2006	14.31
1414	14/04/2006	14.378
1415	15/04/2006	14.307
1416	16/04/2006	14.208
1417	17/04/2006	14.28
1418	18/04/2006	14.453
1419	19/04/2006	13.711
1420	20/04/2006	13.195
1421	21/04/2006	13.197
1422	22/04/2006	13.163
1423	23/04/2006	13.478
1424	24/04/2006	13.818
1425	25/04/2006	13.801
1426	26/04/2006	13.889
1427	27/04/2006	13.807
1428	28/04/2006	13.738
1429	29/04/2006	13.634
1430	30/04/2006	13.554
1431	1/05/2006	13.286
1432	2/05/2006	13.407
1433	3/05/2006	13.435
1434	4/05/2006	13.384
1435	5/05/2006	13.258
1436	6/05/2006	13.313
1437	7/05/2006	12.871
1438	8/05/2006	12.788
1439	9/05/2006	12.7
1440	10/05/2006	12.741
1441	11/05/2006	12.777
1442	12/05/2006	12.8
1443	13/05/2006	12.593
1444	14/05/2006	12.535
1445	15/05/2006	12.543
1446	16/05/2006	13.067
1447	17/05/2006	13.103
1448	18/05/2006	13.042
1449	19/05/2006	13.003
1450	20/05/2006	12.934
1451	21/05/2006	12.977
1452	22/05/2006	12.803
1453	23/05/2006	12.833
1454	24/05/2006	12.844
1455	25/05/2006	12.88
1456	26/05/2006	13.227
1457	27/05/2006	13.325
1458	28/05/2006	12.929
1459	29/05/2006	12.829
1460	30/05/2006	12.841
1461	31/05/2006	12.894
1462	1/06/2006	12.761
1463	2/06/2006	12.592
1464	3/06/2006	12.562
1465	4/06/2006	12.513
1466	5/06/2006	12.51
1467	6/06/2006	12.477
1468	7/06/2006	12.57
1469	8/06/2006	12.651
1470	9/06/2006	12.691
1471	10/06/2006	12.761
1472	11/06/2006	12.502
1473	12/06/2006	12
1474	13/06/2006	12.036
1475	14/06/2006	12.288
1476	15/06/2006	12.416
1477	16/06/2006	12.413
1478	17/06/2006	12.418
1479	18/06/2006	12.435
1480	19/06/2006	12.514
1481	20/06/2006	12.655
1482	21/06/2006	12.232
1483	22/06/2006	12
1484	23/06/2006	12.058
1485	24/06/2006	11.997
1486	25/06/2006	12.035
1487	26/06/2006	12.054
1488	27/06/2006	12.106
1489	28/06/2006	12.205
1490	29/06/2006	12.127
1491	30/06/2006	12.188
1492	1/07/2006	12.066
1493	2/07/2006	12.01
1494	3/07/2006	12.012
1495	4/07/2006	12.102
1496	5/07/2006	12.229
1497	6/07/2006	12.096
1498	7/07/2006	11.766
1499	8/07/2006	12.002
1500	9/07/2006	12.503
1501	10/07/2006	12.23
1502	11/07/2006	12.228
1503	12/07/2006	12.172
1504	13/07/2006	12.044
1505	14/07/2006	12.093
1506	15/07/2006	12.239
1507	16/07/2006	12.148
1508	17/07/2006	12.21
1509	18/07/2006	12.222
1510	19/07/2006	12.109
1511	20/07/2006	11.991
1512	21/07/2006	12.103
1513	22/07/2006	12.263
1514	23/07/2006	12.052
1515	24/07/2006	12.025
1516	25/07/2006	11.986
1517	26/07/2006	12.145
1518	27/07/2006	12.156
1519	28/07/2006	12.189
1520	29/07/2006	12.091
1521	30/07/2006	11.963
1522	31/07/2006	11.889
1523	1/08/2006	12.051
1524	2/08/2006	12.253
1525	3/08/2006	12.001
1526	4/08/2006	11.821
1527	5/08/2006	11.905
1528	6/08/2006	12.091
1529	7/08/2006	12.306
1530	8/08/2006	12.283
1531	9/08/2006	12.116
1532	10/08/2006	12.047
1533	11/08/2006	12.073
1534	12/08/2006	11.985
1535	13/08/2006	12.045
1536	14/08/2006	12.061
1537	15/08/2006	12.084
1538	16/08/2006	12.102
1539	17/08/2006	11.704
1540	18/08/2006	11.606
1541	19/08/2006	11.582
1542	20/08/2006	11.407
1543	21/08/2006	11.253
1544	22/08/2006	11.316
1545	23/08/2006	11.597
1546	24/08/2006	11.493
1547	25/08/2006	11.421
1548	26/08/2006	11.476
1549	27/08/2006	11.763
1550	28/08/2006	11.554
1551	29/08/2006	11.413
1552	30/08/2006	11.467
1553	31/08/2006	11.494
1554	1/09/2006	11.491
1555	2/09/2006	11.398
1556	3/09/2006	12.253
1557	4/09/2006	12.26
1558	5/09/2006	12.071
1559	6/09/2006	11.942
1560	7/09/2006	11.949
1561	8/09/2006	11.991
1562	9/09/2006	11.599
1563	10/09/2006	11.836
1564	11/09/2006	12.018
1565	12/09/2006	12.022
1566	13/09/2006	11.92
1567	14/09/2006	11.828
1568	15/09/2006	11.826
1569	16/09/2006	11.917
1570	17/09/2006	12.102
1571	18/09/2006	11.955
1572	19/09/2006	12.253
1573	20/09/2006	12.06
1574	21/09/2006	11.776
1575	22/09/2006	11.638
1576	23/09/2006	11.44
1577	24/09/2006	11.384
1578	25/09/2006	11.403
1579	26/09/2006	11.497
1580	27/09/2006	11.693
1581	28/09/2006	11.797
1582	29/09/2006	11.848
1583	30/09/2006	11.937
1584	1/10/2006	11.901
1585	2/10/2006	12.111
1586	3/10/2006	12.319
1587	4/10/2006	12.244
1588	5/10/2006	12.238
1589	6/10/2006	12.144
1590	7/10/2006	11.92
1591	8/10/2006	11.841
1592	9/10/2006	11.834
1593	10/10/2006	11.993
1594	11/10/2006	12.123
1595	12/10/2006	12.203
1596	13/10/2006	12.176
1597	14/10/2006	11.97
1598	15/10/2006	11.954
1599	16/10/2006	12.27
1600	17/10/2006	12.262
1601	18/10/2006	12.566
1602	19/10/2006	12.633
1603	20/10/2006	12.022
1604	21/10/2006	11.97
1605	22/10/2006	12.014
1606	23/10/2006	12.229
1607	24/10/2006	12.077
1608	25/10/2006	11.974
1609	26/10/2006	11.967
1610	27/10/2006	12.149
1611	28/10/2006	12.025
1612	29/10/2006	12.023
1613	30/10/2006	12.199
1614	31/10/2006	12.241
1615	1/11/2006	12.176
1616	2/11/2006	12.374
1617	3/11/2006	12.428
1618	4/11/2006	12.377
1619	5/11/2006	12.35
1620	6/11/2006	12.369
1621	7/11/2006	12.431
1622	8/11/2006	12.176
1623	9/11/2006	12.023
1624	10/11/2006	12.073
1625	11/11/2006	12.262
1626	12/11/2006	12.201
1627	13/11/2006	12.123
1628	14/11/2006	12.102
1629	15/11/2006	11.937
1630	16/11/2006	11.791
1631	17/11/2006	11.758
1632	18/11/2006	12.402
1633	19/11/2006	12.609
1634	20/11/2006	12.639
1635	21/11/2006	12.683
1636	22/11/2006	12.79
1637	23/11/2006	13.078
1638	24/11/2006	12.988
1639	25/11/2006	12.809
1640	26/11/2006	12.665
1641	27/11/2006	12.584
1642	28/11/2006	12.27
1643	29/11/2006	12.566
1644	30/11/2006	12.771
1645	1/12/2006	12.623
1646	2/12/2006	12.605
1647	3/12/2006	12.65
1648	4/12/2006	12.688
1649	5/12/2006	12.81
1650	6/12/2006	13.355
1651	7/12/2006	13.364
1652	8/12/2006	13.474
1653	9/12/2006	13.481
1654	10/12/2006	13.383
1655	11/12/2006	12.796
1656	12/12/2006	12.438
1657	13/12/2006	12.466
1658	14/12/2006	12.842
1659	15/12/2006	12.83
1660	16/12/2006	12.826
1661	17/12/2006	12.743
1662	18/12/2006	13.576
1663	19/12/2006	13.742
1664	20/12/2006	13.741
1665	21/12/2006	13.87
1666	22/12/2006	14.026
1667	23/12/2006	14.792
1668	24/12/2006	14.699
1669	25/12/2006	14.69
1670	26/12/2006	14.419
1671	27/12/2006	14.257
1672	28/12/2006	14.078
1673	29/12/2006	14.077
1674	30/12/2006	14.111
1675	31/12/2006	13.881
1676	1/01/2007	14.353
1677	2/01/2007	14.612
1678	3/01/2007	15.54
1679	4/01/2007	15.615
1680	5/01/2007	15.77
1681	6/01/2007	14.902
1682	7/01/2007	14.527
1683	8/01/2007	14.304
1684	9/01/2007	14.299
1685	10/01/2007	14.269
1686	11/01/2007	14.137
1687	12/01/2007	14.442
1688	13/01/2007	14.69
1689	14/01/2007	14.663
1690	15/01/2007	14.664
1691	16/01/2007	15.108
1692	17/01/2007	16.385
1693	18/01/2007	17.138
1694	19/01/2007	17.283
1695	20/01/2007	17.39
1696	21/01/2007	16.78
1697	22/01/2007	16.013
1698	23/01/2007	14.984
1699	24/01/2007	15.092
1700	25/01/2007	15.138
1701	26/01/2007	15.165
1702	27/01/2007	15.01
1703	28/01/2007	15.722
1704	29/01/2007	15.072
1705	30/01/2007	15.474
1706	31/01/2007	15.184
1707	1/02/2007	15.06
1708	2/02/2007	15.16
1709	3/02/2007	15.328
1710	4/02/2007	15.809
1711	5/02/2007	15.976
1712	6/02/2007	15.98
1713	7/02/2007	15.583
1714	8/02/2007	16.268
1715	9/02/2007	16.443
1716	10/02/2007	16.489
1717	11/02/2007	16.575
1718	12/02/2007	16.583
1719	13/02/2007	16.596
1720	14/02/2007	17.273
1721	15/02/2007	17.642
1722	16/02/2007	17.702
1723	17/02/2007	17.831
1724	18/02/2007	18.052
1725	19/02/2007	18.14
1726	20/02/2007	18.231
1727	21/02/2007	18.193
1728	22/02/2007	18.062
1729	23/02/2007	17.534
1730	24/02/2007	17.485
1731	25/02/2007	17.473
1732	26/02/2007	17.585
1733	27/02/2007	17.65
1734	28/02/2007	17.552
1735	1/03/2007	18.39
1736	2/03/2007	18.525
1737	3/03/2007	18.514
1738	4/03/2007	18.393
1739	5/03/2007	17.787
1740	6/03/2007	17.569
1741	7/03/2007	17.724
1742	8/03/2007	17.555
1743	9/03/2007	17.656
1744	10/03/2007	17.543
1745	11/03/2007	17.502
1746	12/03/2007	17.323
1747	13/03/2007	15.859
1748	14/03/2007	15.733
1749	15/03/2007	15.907
1750	16/03/2007	16.132
1751	17/03/2007	15.892
1752	18/03/2007	15.942
1753	19/03/2007	16.03
1754	20/03/2007	16.39
1755	21/03/2007	16.309
1756	22/03/2007	16.382
1757	23/03/2007	16.223
1758	24/03/2007	15.899
1759	25/03/2007	15.915
1760	26/03/2007	15.941
1761	27/03/2007	16.126
1762	28/03/2007	16.33
1763	29/03/2007	16.133
1764	30/03/2007	16.329
1765	31/03/2007	15.603
1766	1/04/2007	15.286
1767	2/04/2007	15.209
1768	3/04/2007	14.96
1769	4/04/2007	14.902
1770	5/04/2007	14.923
1771	6/04/2007	15.024
1772	7/04/2007	15.07
1773	8/04/2007	15.094
1774	9/04/2007	15.094
1775	10/04/2007	15.047
1776	11/04/2007	14.908
1777	12/04/2007	14.862
1778	13/04/2007	15.058
1779	14/04/2007	15.115
1780	15/04/2007	15.26
1781	16/04/2007	15.122
1782	17/04/2007	15.128
1783	18/04/2007	14.515
1784	19/04/2007	14.483
1785	20/04/2007	14.409
1786	21/04/2007	14.641
1787	22/04/2007	15.085
1788	23/04/2007	15.157
1789	24/04/2007	14.951
1790	25/04/2007	14.945
1791	26/04/2007	14.62
1792	27/04/2007	14.522
1793	28/04/2007	14.437
1794	29/04/2007	14.453
1795	30/04/2007	14.486
1796	1/05/2007	14.052
1797	2/05/2007	14.357
1798	3/05/2007	14.564
1799	4/05/2007	14.33
1800	5/05/2007	14.35
1801	6/05/2007	14.382
1802	7/05/2007	14.635
1803	8/05/2007	14.82
1804	9/05/2007	14.508
1805	10/05/2007	14.531
1806	11/05/2007	14.706
1807	12/05/2007	14.727
1808	13/05/2007	14.436
1809	14/05/2007	14.388
1810	15/05/2007	14.408
1811	16/05/2007	14.516
1812	17/05/2007	14.742
1813	18/05/2007	14.771
1814	19/05/2007	14.747
1815	20/05/2007	14.503
1816	21/05/2007	14.587
1817	22/05/2007	14.583
1818	23/05/2007	14.611
1819	24/05/2007	14.618
1820	25/05/2007	14.539
1821	26/05/2007	14.383
1822	27/05/2007	14.416
1823	28/05/2007	14.516
1824	29/05/2007	14.238
1825	30/05/2007	14.138
1826	31/05/2007	14.179
1827	1/06/2007	14.247
1828	2/06/2007	14.305
1829	3/06/2007	14.318
1830	4/06/2007	14.253
1831	5/06/2007	14.09
1832	6/06/2007	14.12
1833	7/06/2007	14.274
1834	8/06/2007	14.05
1835	9/06/2007	14.032
1836	10/06/2007	14.133
1837	11/06/2007	14.22
1838	12/06/2007	14.229
1839	13/06/2007	13.958
1840	14/06/2007	13.843
1841	15/06/2007	13.978
1842	16/06/2007	14.063
1843	17/06/2007	13.878
1844	18/06/2007	13.679
1845	19/06/2007	13.601
1846	20/06/2007	13.532
1847	21/06/2007	13.613
1848	22/06/2007	13.734
1849	23/06/2007	13.793
1850	24/06/2007	13.692
1851	25/06/2007	13.495
1852	26/06/2007	13.476
1853	27/06/2007	13.602
1854	28/06/2007	13.21
1855	29/06/2007	13.227
1856	30/06/2007	13.254
1857	1/07/2007	13.339
1858	2/07/2007	13.42
1859	3/07/2007	13.346
1860	4/07/2007	13.373
1861	5/07/2007	13.457
1862	6/07/2007	12.916
1863	7/07/2007	13.172
1864	8/07/2007	13.14
1865	9/07/2007	13.134
1866	10/07/2007	13.069
1867	11/07/2007	12.59
1868	12/07/2007	12.588
1869	13/07/2007	12.548
1870	14/07/2007	12.533
1871	15/07/2007	12.62
1872	16/07/2007	12.557
1873	17/07/2007	12.476
1874	18/07/2007	12.367
1875	19/07/2007	12.422
1876	20/07/2007	12.321
1877	21/07/2007	12.373
1878	22/07/2007	12.501
1879	23/07/2007	12.462
1880	24/07/2007	12.203
1881	25/07/2007	12.261
1882	26/07/2007	12.226
1883	27/07/2007	12.073
1884	28/07/2007	12.006
1885	29/07/2007	12.033
1886	30/07/2007	12.138
1887	31/07/2007	12.632
1888	1/08/2007	12.805
1889	2/08/2007	12.74
1890	3/08/2007	12.265
1891	4/08/2007	12.134
1892	5/08/2007	11.955
1893	6/08/2007	11.89
1894	7/08/2007	11.873
1895	8/08/2007	11.956
1896	9/08/2007	12.112
1897	10/08/2007	11.975
1898	11/08/2007	11.955
1899	12/08/2007	12.29
1900	13/08/2007	12.184
1901	14/08/2007	11.84
1902	15/08/2007	11.973
1903	16/08/2007	12.084
1904	17/08/2007	12.083
1905	18/08/2007	11.841
1906	19/08/2007	11.894
1907	20/08/2007	11.836
1908	21/08/2007	11.95
1909	22/08/2007	11.956
1910	23/08/2007	12.003
1911	24/08/2007	11.931
1912	25/08/2007	11.924
1913	26/08/2007	11.826
1914	27/08/2007	12.059
1915	28/08/2007	12.268
1916	29/08/2007	12.317
1917	30/08/2007	12.514
1918	31/08/2007	12.438
1919	1/09/2007	12.207
1920	2/09/2007	12.122
1921	3/09/2007	12.232
1922	4/09/2007	12.254
1923	5/09/2007	12.275
1924	6/09/2007	12.2
1925	7/09/2007	12.191
1926	8/09/2007	12.109
1927	9/09/2007	12.155
1928	10/09/2007	12.184
1929	11/09/2007	12.464
1930	12/09/2007	12.352
1931	13/09/2007	12.212
1932	14/09/2007	12.215
1933	15/09/2007	12.159
1934	16/09/2007	12.147
1935	17/09/2007	12.435
1936	18/09/2007	12.462
1937	19/09/2007	12.383
1938	20/09/2007	12.332
1939	21/09/2007	12.367
1940	22/09/2007	12.449
1941	23/09/2007	12.459
1942	24/09/2007	12.382
1943	25/09/2007	12.367
1944	26/09/2007	12.618
1945	27/09/2007	12.568
1946	28/09/2007	12.67
1947	29/09/2007	12.558
1948	30/09/2007	12.245
1949	1/10/2007	12.259
1950	2/10/2007	12.226
1951	3/10/2007	12.189
1952	4/10/2007	12.161
1953	5/10/2007	12.146
1954	6/10/2007	12.148
1955	7/10/2007	12.221
1956	8/10/2007	12.336
1957	9/10/2007	12.336
1958	10/10/2007	12.33
1959	11/10/2007	12.217
1960	12/10/2007	12.145
1961	13/10/2007	12.21
1962	14/10/2007	12.084
1963	15/10/2007	12.055
1964	16/10/2007	12.104
1965	17/10/2007	12.094
1966	18/10/2007	12.324
1967	19/10/2007	12.462
1968	20/10/2007	12.435
1969	21/10/2007	12.474
1970	22/10/2007	12.357
1971	23/10/2007	12.491
1972	24/10/2007	12.694
1973	25/10/2007	12.81
1974	26/10/2007	12.786
1975	27/10/2007	12.919
1976	28/10/2007	12.656
1977	29/10/2007	12.561
1978	30/10/2007	12.57
1979	31/10/2007	12.639
1980	1/11/2007	12.666
1981	2/11/2007	12.943
1982	3/11/2007	12.931
1983	4/11/2007	12.791
1984	5/11/2007	12.935
1985	6/11/2007	13.106
1986	7/11/2007	13.643
1987	8/11/2007	13.786
1988	9/11/2007	13.715
1989	10/11/2007	13.71
1990	11/11/2007	13.645
1991	12/11/2007	13.323
1992	13/11/2007	13.377
1993	14/11/2007	13.598
1994	15/11/2007	13.706
1995	16/11/2007	14.451
1996	17/11/2007	14.301
1997	18/11/2007	14.532
1998	19/11/2007	14.272
1999	20/11/2007	14.419
[truncated: 4,456 more rows]
